# Supplementary material for: The balance of metagenomic elements shapes the skin microbiome in acne and health
Source: PubMed Central journal article supplement (PMC5175143; doi:10.1038/srep39491), 2016-12-21
Supplement: srep39491-s1.pdf [file srep39491-s1.pdf]

## **Supplementary Information**

### **Title:**

The balance of metagenomic elements shapes the skin microbiome in acne and health

### **Authors:**

Emma Barnard, Baochen Shi, Dezhi Kang, Noah Craft, and Huiying Li

## Supplementary Text

### Observed low abundance of fungal species in the skin follicle

We identified the sequencing reads mapped to six fungal species (Fig. 1B). Compared to bacteria, the reads mapped to fungal species in our metagenomic shotgun data were markedly fewer (Fig. 1A). When we combined all the reads mapped to fungal species, the maximum genome coverage for any one fungal species was 0.56X (*Malassezia globosa*) (Fig. 1B). One explanation for the observed low abundance of fungi in our dataset is that the DNA extraction method used was not optimized for retrieval of fungal DNA. Extraction of fungal DNA requires harsh methods due to the complex nature of the fungal cell wall. Another explanation is that the fungal burden of the skin follicle may be naturally low. A recent skin metagenomic study, optimized for fungal DNA recovery, revealed low fungal biomass across sebaceous sites<sup>1</sup>. Additionally, a previous study, which visualized bacteria inside the sebaceous follicle, was unable to detect any fungal species in either acne or healthy skin follicles from the face<sup>2</sup>. Fungi have previously been thought to play a role in acne, having been isolated from the follicles of the upper back skin of acne patients<sup>3</sup>. With deep sequencing of the follicular microbiota, we identified fungi in the skin follicle with low prevalence and abundance, and found no significant difference between acne patients and healthy individuals.

### The role of minor bacterial taxa in the skin follicle

Previous studies have highlighted the role of lowly abundant species in disrupting the existing host-microbial homeostasis in other inflammatory conditions<sup>4</sup>. Deep sequencing allowed us to identify and compare the prevalence and abundance of minor taxa between acne patients and healthy individuals. In the skin follicle, we found low relative abundances of Firmicutes, Proteobacteria, Cyanobacteria, and Bacteroidetes (Fig. 1D). Among them, Firmicutes and Proteobacteria species were more abundant in acne patients (Fig. 1D; Table 1). One explanation for the observation is that lesional skin, as a result of inflammation, may provide an ideal niche for the growth of non-skin commensal species. Changes in the microbiota at damaged skin sites have been previously reported, with Gram-negative and Enterococci species shown to be twice as likely to colonize at damaged skin sites<sup>5</sup>. Cyanobacteria are not considered normal

inhabitants of the skin in general, yet have been detected at low abundances at sebaceous sites of healthy individuals and shown persistent on palm skin<sup>6-8</sup>. The variable presence, low prevalence, and low abundance of the minor taxa in both acne patients and, albeit lower, in healthy individuals suggest that these species are less likely to be causative. Furthermore, the reduced relative abundance of *Propionibacteria* in acne patients compared to healthy individuals may lead to an increase in the skin pH, disrupting the healthy skin environment, subsequently facilitating colonization of pathogens and other opportunistic organisms.

### Classification of clinical states using weighted gene voting algorithm

We performed a supervised class prediction analysis. Differentially abundant metagenomic elements, including *P. acnes* OGUs and bacterial species, were determined between two groups of samples (healthy and acne). We employed a method similar to that described by Golub *et al.* and Bleharski *et al.*<sup>9,10</sup>, using the formula:

$$PS = \frac{\sum_{g=1}^n t_g \times \left( X_g - \left( \frac{\mu_{1g} + \mu_{2g}}{2} \right) \right)}{\sum_{g=1}^n \left| t_g \times \left( X_g - \left( \frac{\mu_{1g} + \mu_{2g}}{2} \right) \right) \right|}$$

where PS is the prediction strength, a measure of the relative margin of victory of the vote,  $X_g$  is the relative abundance of the metagenomic element (g) in the tested sample,  $\mu_{1g}$  and  $\mu_{2g}$  are the means of the relative abundances of metagenomic element (g) in the two groups, and  $t_g$  is the t-test score of the metagenomic element (g) when its relative abundance is compared between the two groups using the Student's t-test. The numerator indicates the difference between the winning and losing classes, and the denominator indicates the totals for the winning and losing classes.

## Supplementary References

- 1 Oh, J. *et al.* Biogeography and individuality shape function in the human skin metagenome. *Nature* **514**, 59-64, doi:10.1038/nature13786 (2014).
- 2 Jahns, A. C. *et al.* An increased incidence of *Propionibacterium acnes* biofilms in acne vulgaris: a case-control study. *Br J Dermatol* **167**, 50-58, doi:10.1111/j.1365-2133.2012.10897.x (2012).
- 3 Leeming, J. P., Holland, K. T. & Cunliffe, W. J. The microbial ecology of pilosebaceous units isolated from human skin. *J Gen Microbiol* **130**, 803-807 (1984).
- 4 Hajishengallis, G. *et al.* Low-abundance biofilm species orchestrates inflammatory periodontal disease through the commensal microbiota and complement. *Cell Host Microbe* **10**, 497-506, doi:10.1016/j.chom.2011.10.006 (2011).
- 5 Larson, E. L. *et al.* Changes in bacterial flora associated with skin damage on hands of health care personnel. *Am J Infect Control* **26**, 513-521 (1998).
- 6 Grice, E. A. *et al.* Topographical and temporal diversity of the human skin microbiome. *Science* **324**, 1190-1192, doi:10.1126/science.1171700 (2009).
- 7 Grice, E. A. & Segre, J. A. The skin microbiome. *Nat Rev Microbiol* **9**, 244-253, doi:10.1038/nrmicro2537 (2011).
- 8 Caporaso, J. G. *et al.* Moving pictures of the human microbiome. *Genome Biol* **12**, R50, doi:10.1186/gb-2011-12-5-r50 (2011).
- 9 Golub, T. R. *et al.* Molecular classification of cancer: class discovery and class prediction by gene expression monitoring. *Science* **286**, 531-537 (1999).
- 10 Bleharski, J. R. *et al.* Use of genetic profiling in leprosy to discriminate clinical forms of the disease. *Science* **301**, 1527-1530, doi:10.1126/science.1087785 (2003).
- 11 Marples, R. R., McGinley, K. J. & Mills, O. H. Microbiology of comedones in acne vulgaris. *J Invest Dermatol* **60**, 80-83 (1973).
- 12 Knutson, D. D. Ultrastructural observations in acne vulgaris: the normal sebaceous follicle and acne lesions. *J Invest Dermatol* **62**, 288-307 (1974).
- 13 Cunliffe, W. J. & Gould, D. J. Prevalence of facial acne vulgaris in late adolescence and in adults. *Br Med J* **1**, 1109-1110 (1979).
- 14 Knop, J., Ollefs, K. & Frosch, P. J. Anti-*P. acnes* antibody in comedonal extracts. *J Invest Dermatol* **80**, 9-12 (1983).

- 15 Sheehan-Dare, R. A., Hughes, B. R. & Cunliffe, W. J. Clinical markers of androgenicity in acne vulgaris. *Br J Dermatol* **119**, 723-730 (1988).
- 16 Vahlquist, A., Rollman, O., Holland, D. B. & Cunliffe, W. J. Isotretinoin treatment of severe acne affects the endogenous concentration of vitamin A in sebaceous glands. *J Invest Dermatol* **94**, 496-498 (1990).
- 17 Eady, E. A. et al. The effects of acne treatment with a combination of benzoyl peroxide and erythromycin on skin carriage of erythromycin-resistant propionibacteria. *Br J Dermatol* **134**, 107-113 (1996).
- 18 Pappas, A., Johnsen, S., Liu, J. C. & Eisinger, M. Sebum analysis of individuals with and without acne. *Dermatoendocrinol* **1**, 157-161 (2009).

**A**

| Clinical group              | Acne       | Healthy (age-matched) | Healthy 55+ |
|-----------------------------|------------|-----------------------|-------------|
| Number of subjects          | 38         | 30                    | 4           |
| <b>Gender n (%)</b>         |            |                       |             |
| Males                       | 13 (34%)   | 16 (53%)              | 2(50%)      |
| Females                     | 25 (66%)   | 14 (47%)              | 2(50%)      |
| <b>Age (years)</b>          |            |                       |             |
| Range                       | 14-37      | 16-38                 | 55-79       |
| Average                     | 24         | 26                    | 67.5        |
| Median                      | 24.5       | 27                    | 68          |
| <b>Ethnicity/Race n (%)</b> |            |                       |             |
| American Indian             | 1 (2.6%)   | 0                     | 0           |
| Asian                       | 12 (31.6%) | 10 (33%)              | 2 (50%)     |
| Black                       | 6 (15.8%)  | 0                     | 0           |
| Hispanic                    | 5 (13%)    | 10 (33%)              | 0           |
| White                       | 11 (29%)   | 8 (27%)               | 2 (50%)     |
| More than one race          | 3 (8%)     | 2 (7%)                | 0           |

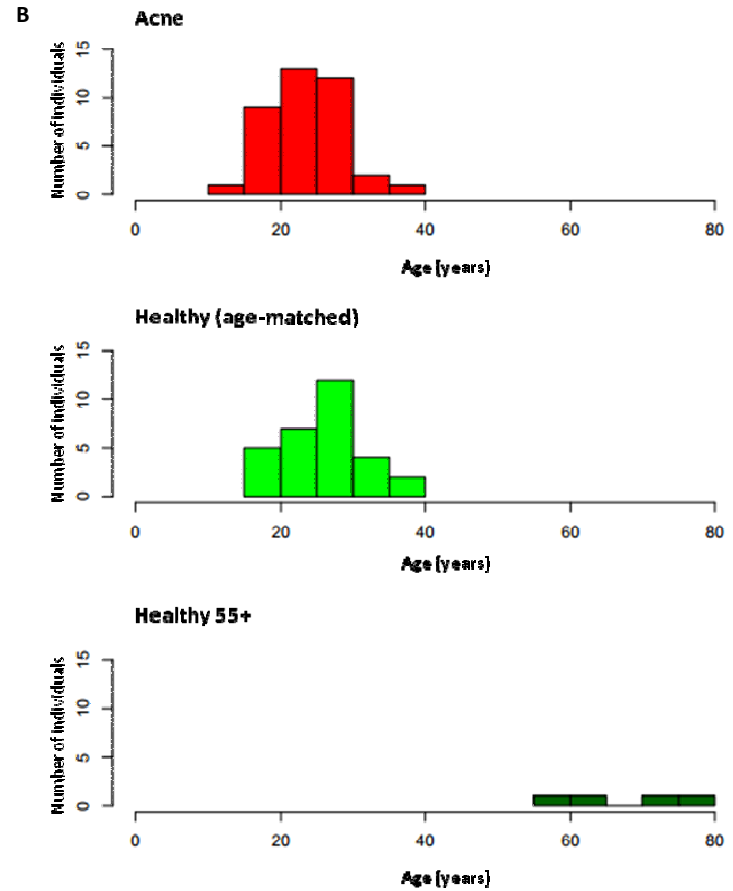

**Supplementary Fig. S1: Clinical information of the study participants.** **A)** Clinical information of the acne patients (n=38), age-matched healthy individuals (n=30), and healthy individual with age over 55 (n=4). **B)** Histograms of age distribution within each subject group. Similar to previous studies<sup>11-18</sup>, we include both teenagers and young adults in acne and healthy age-matched groups.

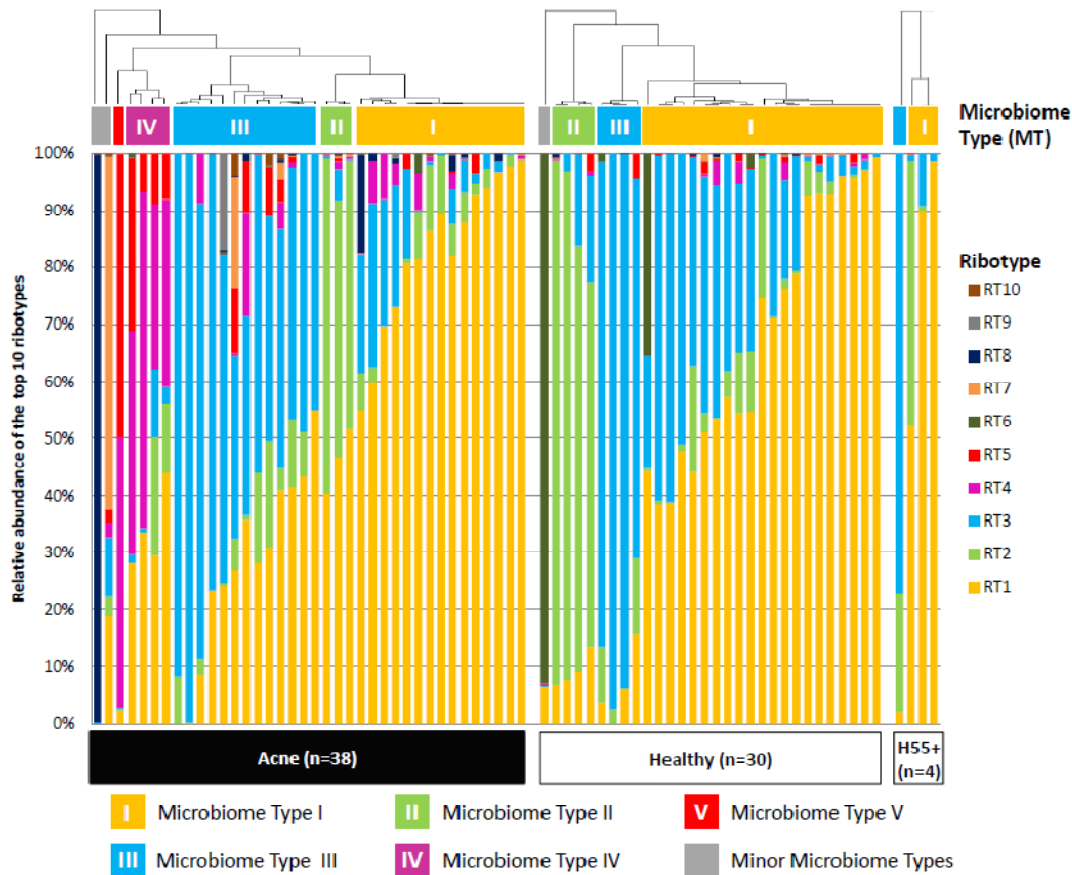

**Supplementary Fig. S2: *P. acnes* strain populations are different between acne patients and healthy individuals.** Each column represents the relative abundances of the top ten *P. acnes* ribotypes in each individual. Acne patients, age-matched healthy individuals, and healthy individuals with age over 55 were included. Individuals often harbor more than one ribotype (an average of 2.3 ribotypes per person). Individuals were clustered based on the composition of the top ten ribotypes. Microbiome Types IV and V were found in the acne patients, but not in the healthy individuals.

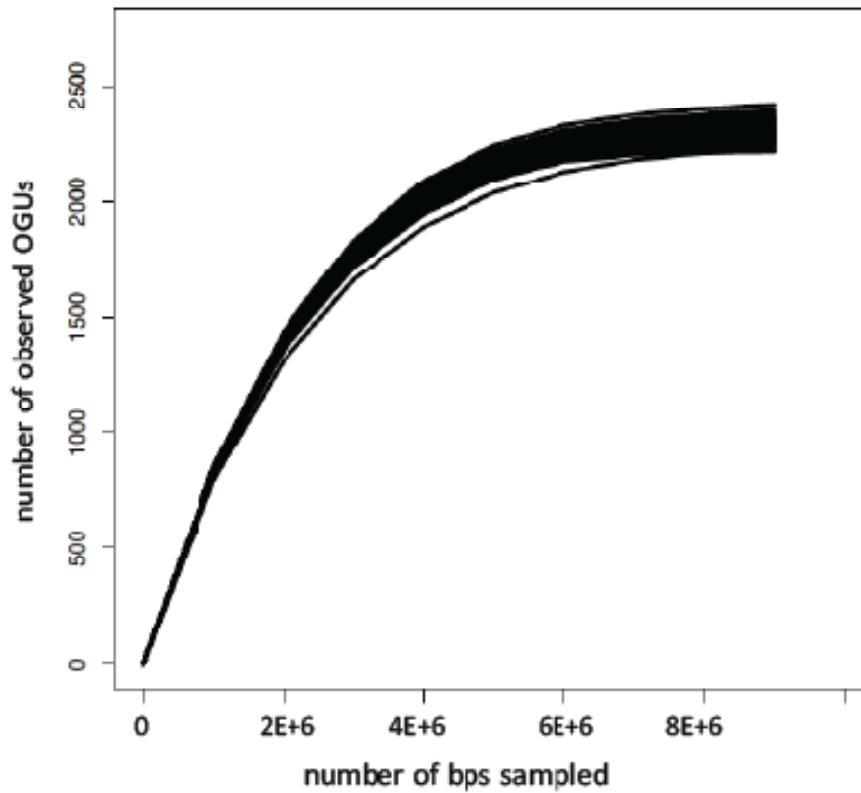

**Supplementary Fig. S3: Rarefaction curves indicate sufficient sequencing depth of all samples.** The rarefaction curves of the 72 samples all reached the plateau, suggesting that the sequencing depth of all the samples was sufficient for detecting *P. acnes* OGUs and for comparative functional profiling. The sequencing depth ranged from  $6.9 \times 10^7$  –  $4.8 \times 10^9$  base pairs per sample. The rarefaction curves beyond  $9 \times 10^6$  base pairs are not shown.



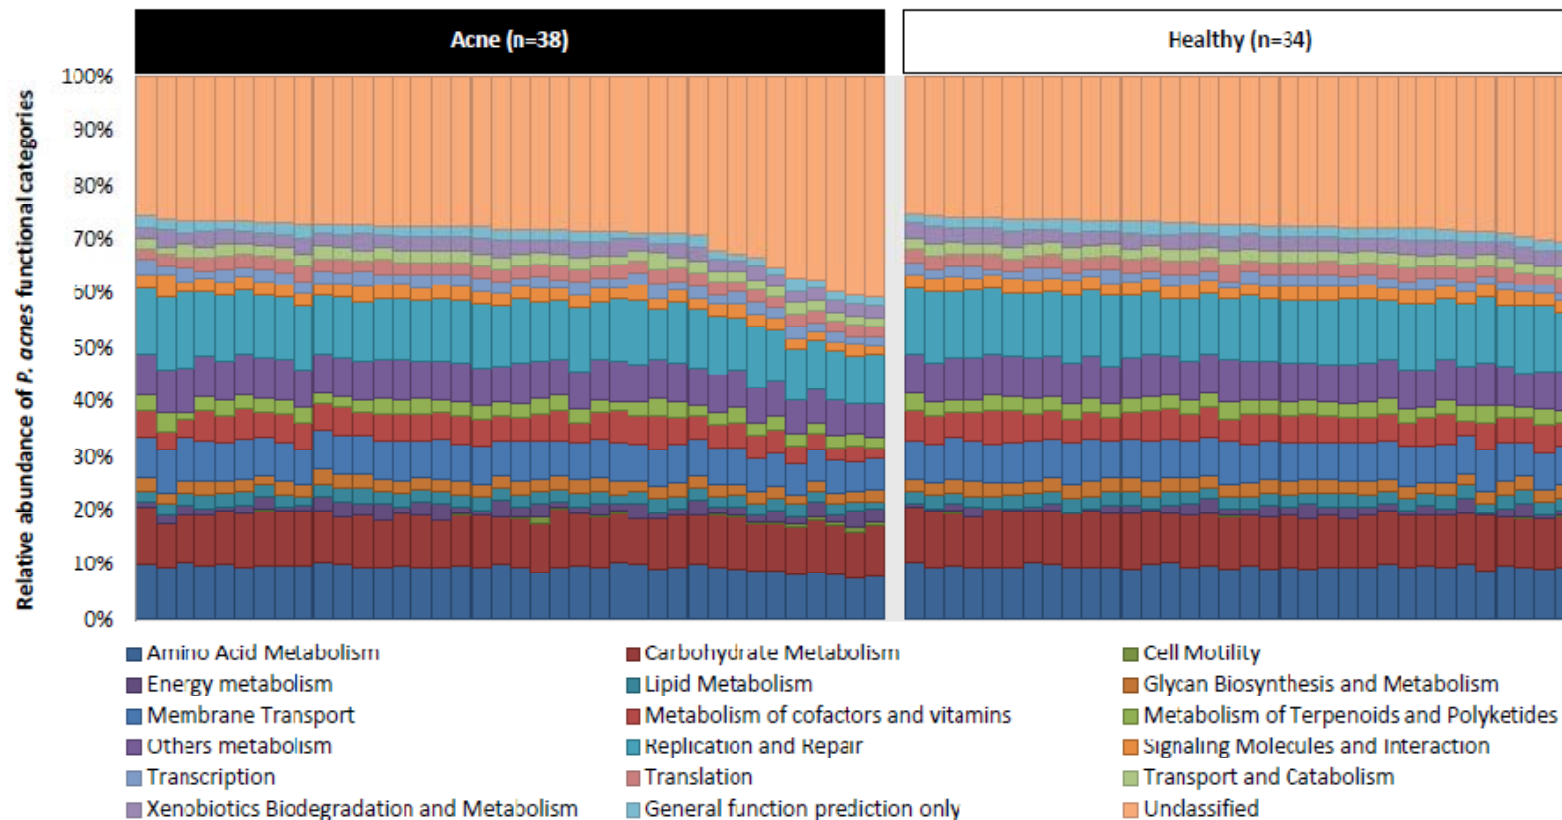

**Supplementary Fig. S4: Functional profiles of the differentially abundant OGU in acne patients and healthy individuals.** *P. acnes* OGU that were differentially abundant between acne patients and healthy individuals were assigned to functional categories. The functional profiles from the acne patients varied between individuals with higher abundances of unclassified genes, while in healthy individuals the functional profiles remained relatively stable across individuals.

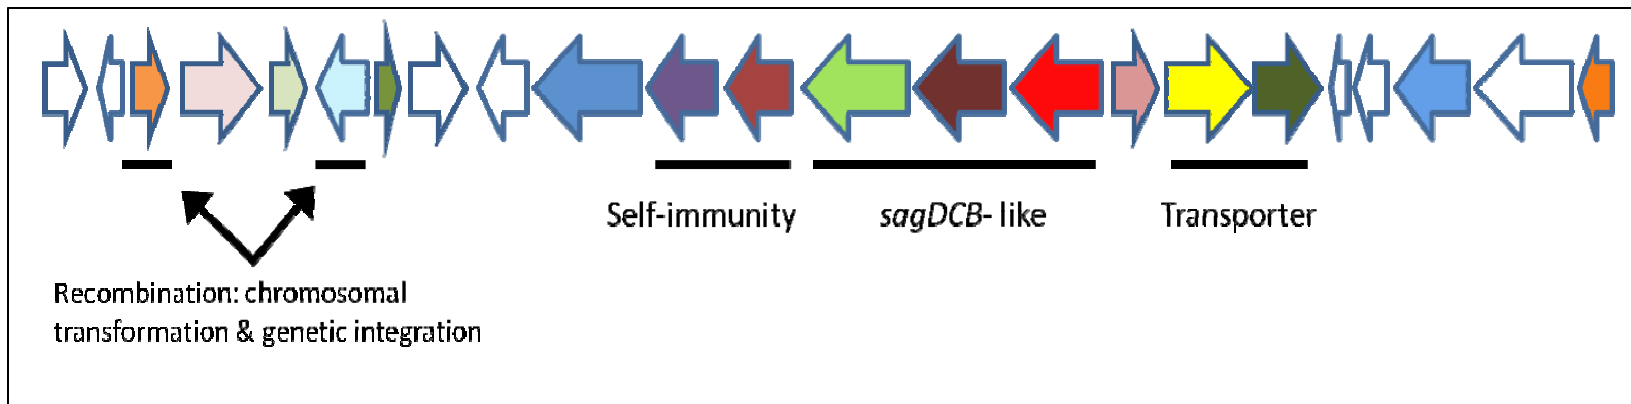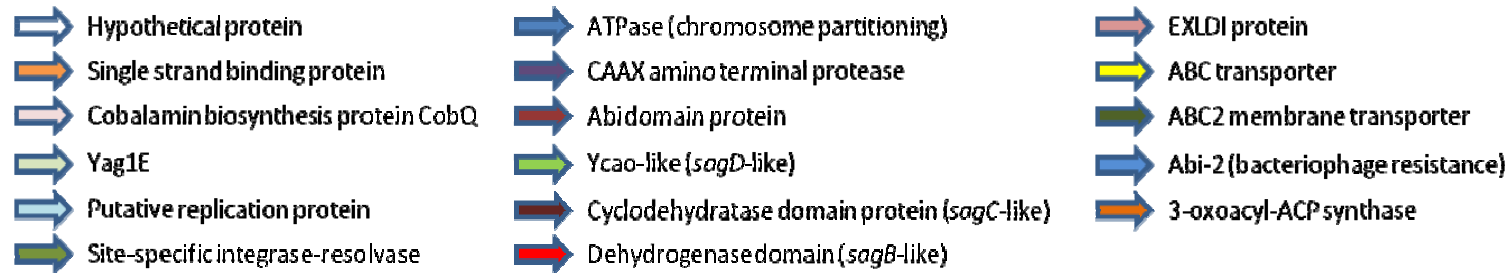

**Supplementary Fig. S5: Locus 2 encodes virulence-related genes.** Locus 2 is a 20 Kb genomic island predominantly found in *P. acnes* clade IA-2 strains, RT4 and RT5. Locus 2 encodes 23 ORFs including a cluster of Streptolysin S-associated genes (*sag*) involved in biosynthesis and transport of bacterial toxins as well as self-immunity. Relative gene length and directionality for each gene encoded in locus 2 of *P. acnes* HL096PA1 is shown.

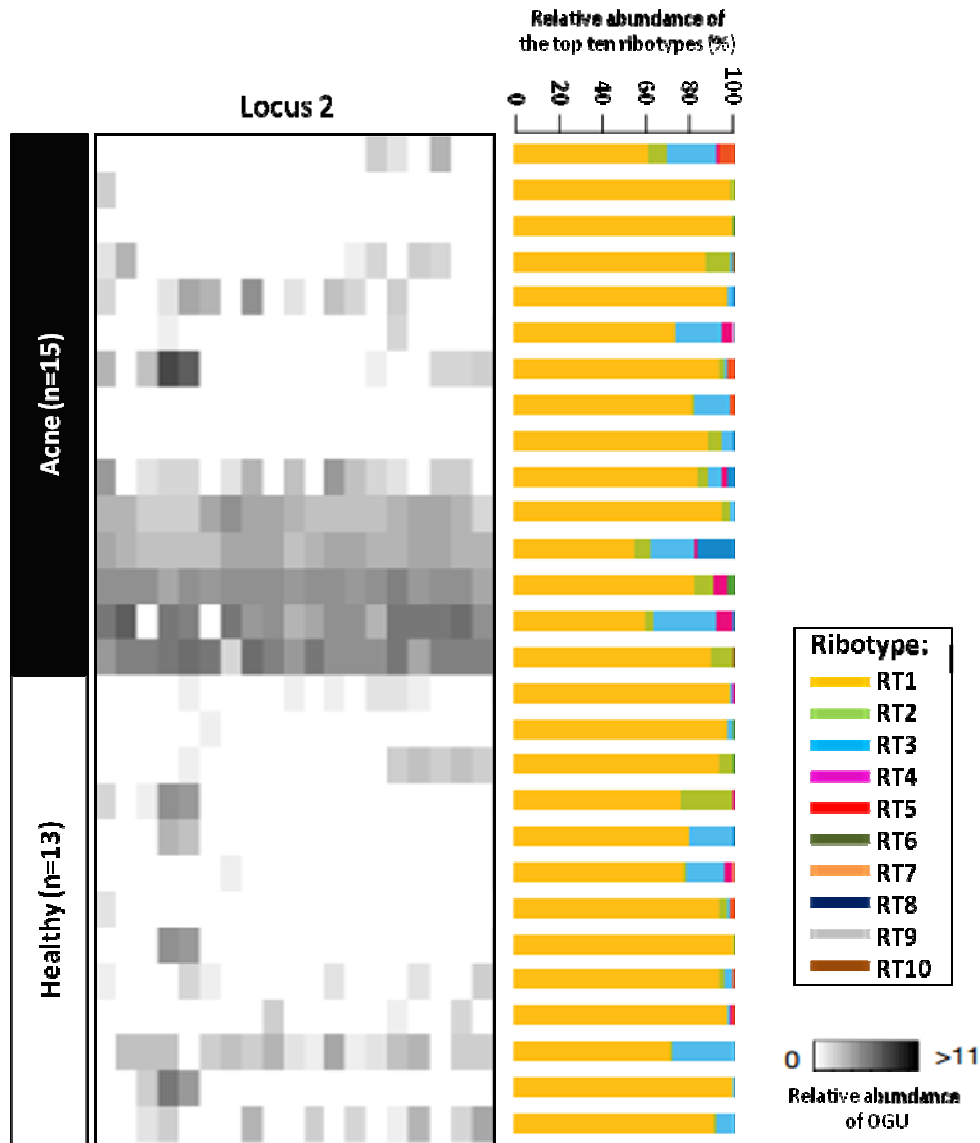

**Supplementary Fig. S6: Locus 2 was more abundant in the acne patients with MTI than in the healthy individuals with MTI.** The relative abundance of locus 2 in 15 acne patients and 13 healthy individuals with MTI is shown. Each column represents one of the 19 OGUs of locus 2, which were significantly different between acne patients and healthy individuals, plotted in the order of their genomic positions in the locus (as listed in Supplementary Table S1). A significant increase ( $P=0.02$ ) of the relative abundances of locus 2 OGUs was observed in acne patients compared to healthy individuals with MTI. The top ten ribotype composition for each individual is also shown.

**Supplementary Table S1: Differentially abundant *P. acnes* OGU between acne patients and healthy individuals.**

| <i>P. acnes</i> Gene ID | Predicted function                                            | Clinical Association |
|-------------------------|---------------------------------------------------------------|----------------------|
| PAGK_0029               | Transcriptional regulator                                     | Acne                 |
| PAGK_0033               | Acetyltransferase                                             | Health               |
| PAGK_0136               | Putative glycosyl transferase                                 | Health               |
| PAGK_0138               | Chain-length determining protein                              | Health               |
| PAGK_0160 (Locus 2)     | Hypothetical protein                                          | Acne                 |
| PAGK_0161 (Locus 2)     | Hypothetical protein                                          | Acne                 |
| PAGK_0162 (Locus 2)     | Single-strand binding protein (Ssb)                           | Acne                 |
| PAGK_0163 (Locus 2)     | Cobalamin biosynthesis protein CobQ/partitioning protein RepA | Acne                 |
| PAGK_0164 (Locus 2)     | Yag1E                                                         | Acne                 |
| PAGK_0165 (Locus 2)     | Putative replication protein                                  | Acne                 |
| PAGK_0166 (Locus 2)     | Site-specific integrase-resolvase                             | Acne                 |
| PAGK_0167 (Locus 2)     | Hypothetical protein                                          | Acne                 |
| PAGK_0168 (Locus 2)     | Hypothetical protein                                          | Acne                 |
| PAGK_0169 (Locus 2)     | ATPase/chromosome partitioning                                | Acne                 |
| PAGK_0170 (Locus 2)     | Caax amino terminal protease                                  | Acne                 |
| PAGK_0171 (Locus 2)     | Abi domain protein                                            | Acne                 |
| PAGK_0172 (Locus 2)     | YcaO-like family protein (SagD-like)                          | Acne                 |
| PAGK_0173 (Locus 2)     | Cyclodehydratase protein (SagC-like)                          | Acne                 |
| PAGK_0174 (Locus 2)     | Oxidoreductase protein (SagB-like)                            | Acne                 |
| PAGK_0175 (Locus 2)     | EXLDI domain protein                                          | Acne                 |
| PAGK_0176 (Locus 2)     | ABC transporter/ATP-binding protein                           | Acne                 |
| PAGK_0177 (Locus 2)     | ABC-2 type membrane transporter                               | Acne                 |
| PAGK_0178 (Locus 2)     | Hypothetical protein                                          | Acne                 |
| PAGK_0198               | ABC transporter                                               | Acne                 |
| PAGK_0374               | 2-C-methyl-D-erythritol 4-phosphate                           | Health               |
| PAGK_0387               | L-asparaginase I                                              | Acne                 |
| PAGK_0505               | Sugar transporter family protein                              | Health               |
| PAGK_0665               | Glutamate dehydrogenase                                       | Health               |
| PAGK_0667               | Putative 6-aminohexanoate-dimer hydrolase                     | Health               |
| PAGK_0687               | Hypothetical protein                                          | Health               |
| PAGK_0712               | Hypothetical protein                                          | Health               |
| PAGK_0754               | DNA processing / uptake protein                               | Health               |
| PAGK_0755               | Methylated-DNA--protein-cysteine                              | Health               |
| PAGK_0768               | Translation initiation factor IF-3                            | Health               |
| PAGK_0793               | Site-specific tyrosine recombinase XerD                       | Health               |
| PAGK_0820               | Putative acyltransferase                                      | Health               |
| PAGK_0821               | D-alanine--D-alanine ligase                                   | Health               |
| PAGK_0880               | Putative ATP-binding ABC transporter protein                  | Health               |
| PAGK_0896               | Diaminopimelate decarboxylase                                 | Health               |
| PAGK_0979               | Hypothetical protein                                          | Health               |
| PAGK_0983               | Hypothetical protein                                          | Health               |
| PAGK_0985               | Metallo-beta-lactamase superfamily protein                    | Health               |
| PAGK_1034               | Hypothetical protein                                          | Health               |
| PAGK_1035               | Cobalamin independent methionine synthase                     | Health               |

|                                                     |                                            |        |
|-----------------------------------------------------|--------------------------------------------|--------|
| PAGK_1039                                           | Putative alpha-amylase                     | Health |
| PAGK_1043                                           | Putative pyrophosphohydrolase              | Health |
| PAGK_1113                                           | Putative aminooxidase                      | Health |
| PAGK_1168                                           | 2-dehydropantoate 2-reductase              | Health |
| PAGK_1302                                           | GTPase ObgE                                | Health |
| PAGK_1393                                           | Putative helicase protein                  | Health |
| PAGK_1606                                           | Ferrous iron transport protein B           | Health |
| PAGK_1635                                           | Hypothetical protein                       | Health |
| PAGK_1813                                           | Exodeoxyribonuclease III                   | Health |
| PAGK_1815                                           | Hypothetical protein                       | Health |
| PAGK_1820                                           | 2-oxoglutarate ferredoxin oxidoreductase   | Health |
| PAGK_2086                                           | Potassium transporter                      | Health |
| PAGK_2104                                           | Thiazolypeptide-type bacteriocin precursor | Acne   |
| PAGK_2105                                           | ABC transporter/ATP-binding protein        | Acne   |
| PAGK_2133                                           | Single-strand DNA-binding protein          | Health |
| PAGK_2214                                           | Glycerol uptake facilitator protein        | Health |
| PAGK_2332 (Locus 3)                                 | Plasmid partitioning protein ParA          | Acne   |
| HMPREF9572DFT_Contig29.2.Gli<br>mmer3.p5_hybrid.274 | Hypothetical protein                       | Health |
